# Supplementary material for: The serodominant secreted effector protein of Salmonella, SseB, is a strong CD4 antigen containing an immunodominant epitope presented by diverse HLA class II alleles
Source: PubMed Central journal article supplement (PMC4212957; doi:10.1111/imm.12327), 2014-10-02

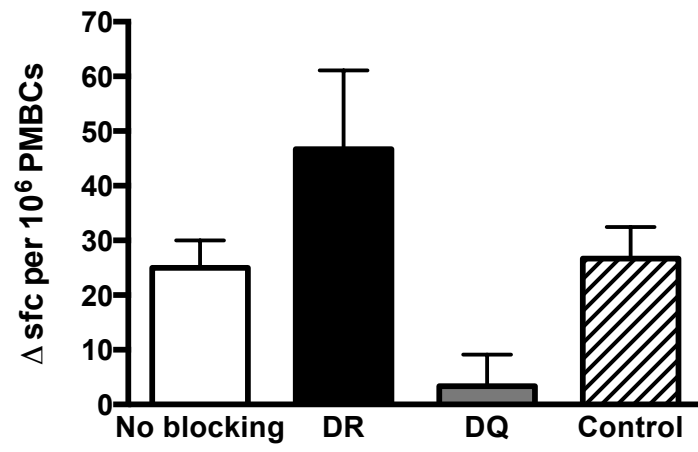

Supplement: imm0143-0438-sd1.pdf [file imm0143-0438-sd1.pdf]
